# Supplementary material for: Chromatin Priming Renders T Cell Tolerance-Associated Genes Sensitive to Activation below the Signaling Threshold for Immune Response Genes
Source: PubMed Central journal article supplement (PMC7296351; doi:10.1016/j.celrep.2020.107748), 2020-06-09
Supplement: mmc1.pdf [file mmc1.pdf]

**Cell Reports, Volume 31**

**Supplemental Information**

**Chromatin Priming Renders T Cell Tolerance-Associated  
Genes Sensitive to Activation below the Signaling  
Threshold for Immune Response Genes**

**Sarah L. Bevington, Sky T.H. Ng, Graham J. Britton, Peter Keane, David C. Wraith, and Peter N. Cockerill**

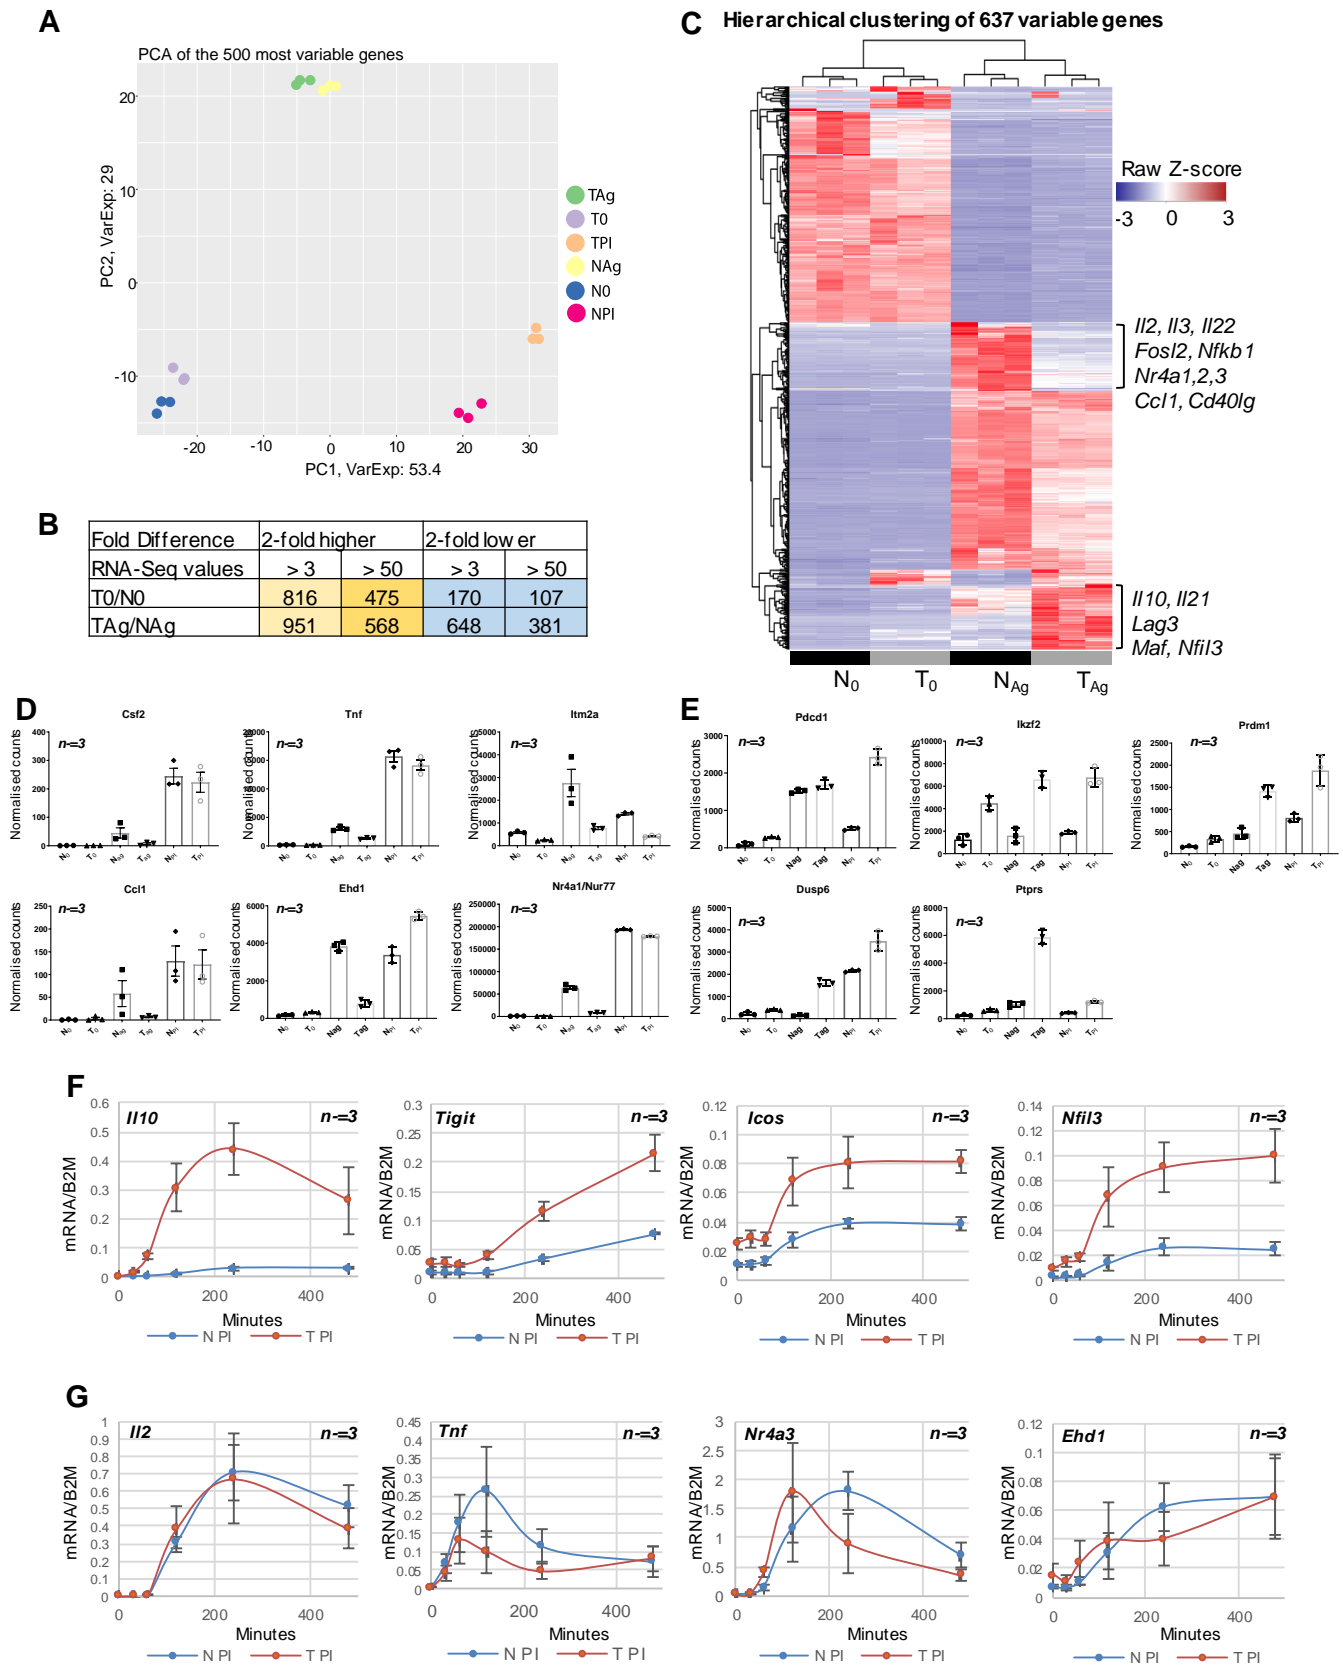

Figure S1.

**Figure S1. Gene expression analyses comparing tolerized T cells with naïve T cells.**

Related to Figure 1.

(A) Principle component analysis of the RNA-Seq data sets for the most variable genes. Data was taken from 3 biological replicates.

(B) Subsets of RNA-Seq data showing numbers of genes that are at least two-fold upregulated or down-regulated in tolerized T cells.

(C) Hierarchical clustering of RNA-Seq data for  $N_0$ ,  $T_0$ ,  $N_{Ag}$  and  $T_{Ag}$  for 637 genes where at least one of the  $T_0:N_0$ ,  $T_{Ag}:N_{Ag}$ ,  $T_{Ag}:T_0$ , or  $N_{Ag}:N_0$  ratios vary by at least 10-fold, and one value is greater than 50 for each pair. RNA-Seq data was taken from three biological replicates.

(D,E) Normalized average counts taken from RNA-Seq data of three biological replicates for immune response genes (D) and the tolerance associated genes (E).

(F,G) Inducible mRNA expression levels of immunomodulatory (F) and immune response genes (G) in Tg4 CD4 naïve and tolerant cells treated *in vitro* with PI ( $N_{PI}$ ,  $T_{PI}$ ) for the times indicated. mRNA levels were normalized relative to beta-2 microglobulin (B2M) expression. Standard deviation is shown for 3 biological replicates.

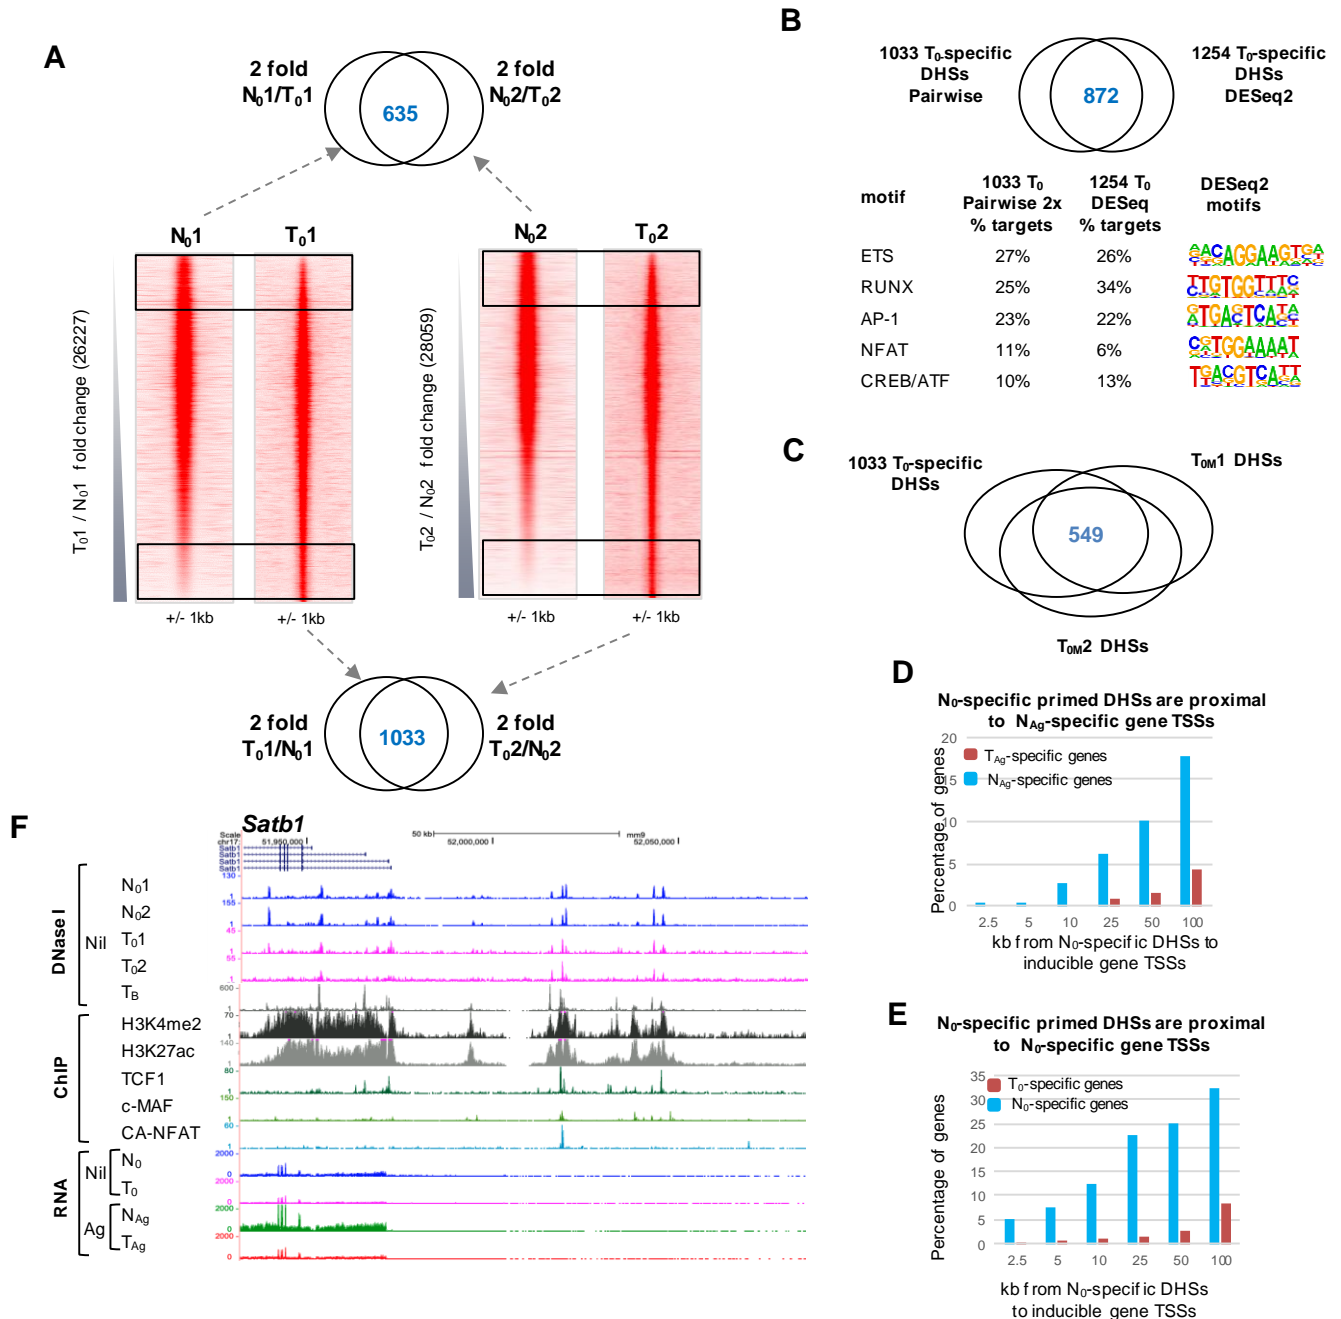

**Figure S2. DNase-Seq analyses of open chromatin in naïve and tolerized T cells.** Related to Figure 2.

(A) DNase-Seq tag density plots showing all 26,227 peaks detected in replicate 1 of T<sub>0</sub>1 and N<sub>0</sub>1 (left) and 28,059 peaks in T<sub>0</sub>2 and N<sub>0</sub>2 (right), ordered by increasing fold change of sequence tag count for T<sub>0</sub> compared to N<sub>0</sub>. Venn diagrams of the 2-fold specific peaks from each set of replicates for T<sub>0</sub>/N<sub>0</sub> (lower) to give 1033 T<sub>0</sub> specific DHSs and N<sub>0</sub>/T<sub>0</sub> (upper) to give 635 N<sub>0</sub> specific peaks.

(B) Upper. Venn diagram depicting the overlap of the 1033 2-fold T<sub>0</sub> specific peaks determined by the pairwise comparison with the 1254 2-fold T<sub>0</sub> specific peaks determined by DESeq2. Lower. HOMER *de novo* identification of TF motifs in the 1033 and 1254 peaks.

(C) Overlap of the 1033 T<sub>0</sub> specific peaks with the peaks detected in T<sub>0M</sub>1 and T<sub>0M</sub>2.

(D,E) Bar graphs showing the percentage of genes which are preferentially induced in T<sub>Ag</sub> or N<sub>Ag</sub> (D) and T<sub>0</sub> or N<sub>0</sub> (E) which are found within 100 kb of the 635 N<sub>0</sub> specific DHSs.

(F) UCSC genome browser tracks for *Satb1* showing DNase-Seq, ChIP-seq and RNA-seq data as for Figure 2G.

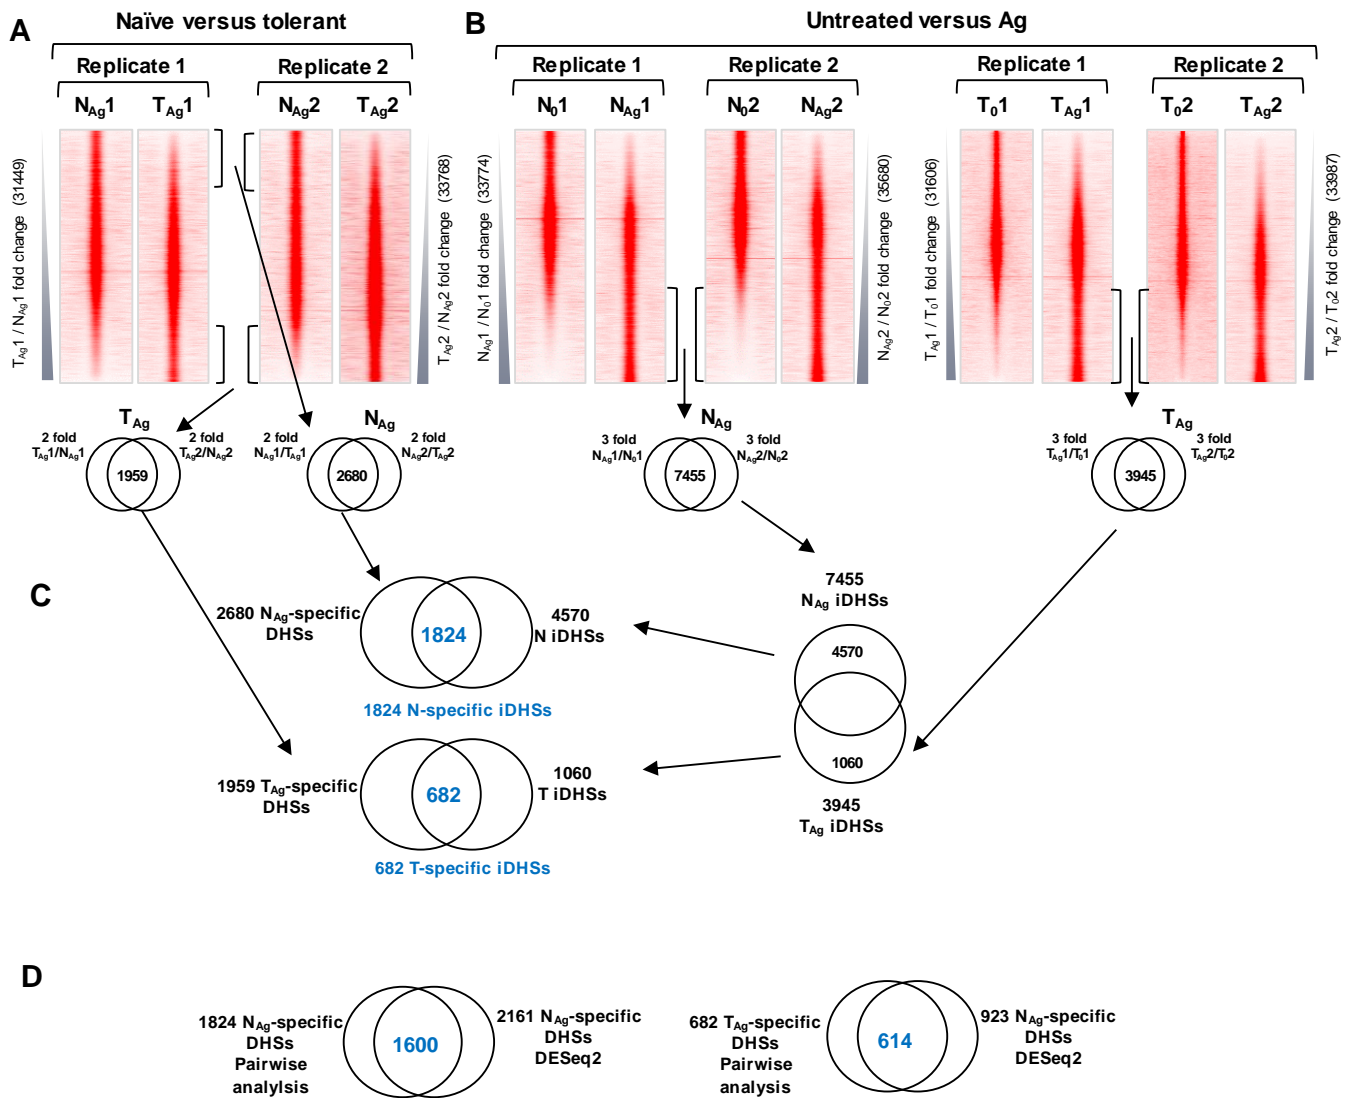

**Figure S3. DNase-Seq analyses of *in vivo*-activated naïve and tolerized T cells.** Related to Figure 3.

(A) DNase-Seq tag density plots showing all peaks in replicates 1 and 2 of  $N_{Ag}$  and  $T_{Ag}$  ordered by increasing fold change of sequence tag count for  $T_{Ag}$  compared to  $N_{Ag}$ . Venn diagrams show the overlap of peaks which are 2 fold enriched in the replicate  $T_{Ag}$  samples (left) and  $N_{Ag}$  samples (right).

(B) DNase-Seq tag density plots showing all peaks in replicates 1 and 2 of  $N_0$  and  $N_{Ag}$  (left) and  $T_0$  and  $T_{Ag}$  (right) ordered by increasing fold change of sequence tag count for Ag compared to 0. Venn diagrams show the overlap of peaks which are 3 fold enriched in the replicate  $N_{Ag}$  samples (left) and  $T_{Ag}$  samples (right).

(C) The right hand Venn diagram overlaps the >3 fold inducible DHSs present in both replicates of the naïve (7455) and tolerant (3945) to give the unique inducible DHSs for each condition (4570  $N_{Ag}$ -iDHSs and 1060  $T_{Ag}$ -iDHSs). The right hand Venn diagrams overlap the >2 fold enriched DHSs in the Ag-treated samples ( $T_{Ag}$  or  $N_{Ag}$  specific) with the unique iDHSs defined on the left to give the 682 Tolerant-specific iDHSs and the 1824 Naive-specific iDHSs.

(D) Overlap of the 1824  $N_{Ag}$  specific iDHSs determined by the pairwise comparison with the 2161  $N_{Ag}$  specific peaks determined by DESeq2 (left) and the 682  $T_{Ag}$  specific iDHSs determined by the pairwise comparison with the 923  $T_{Ag}$  specific peaks determined by DESeq2 (right).

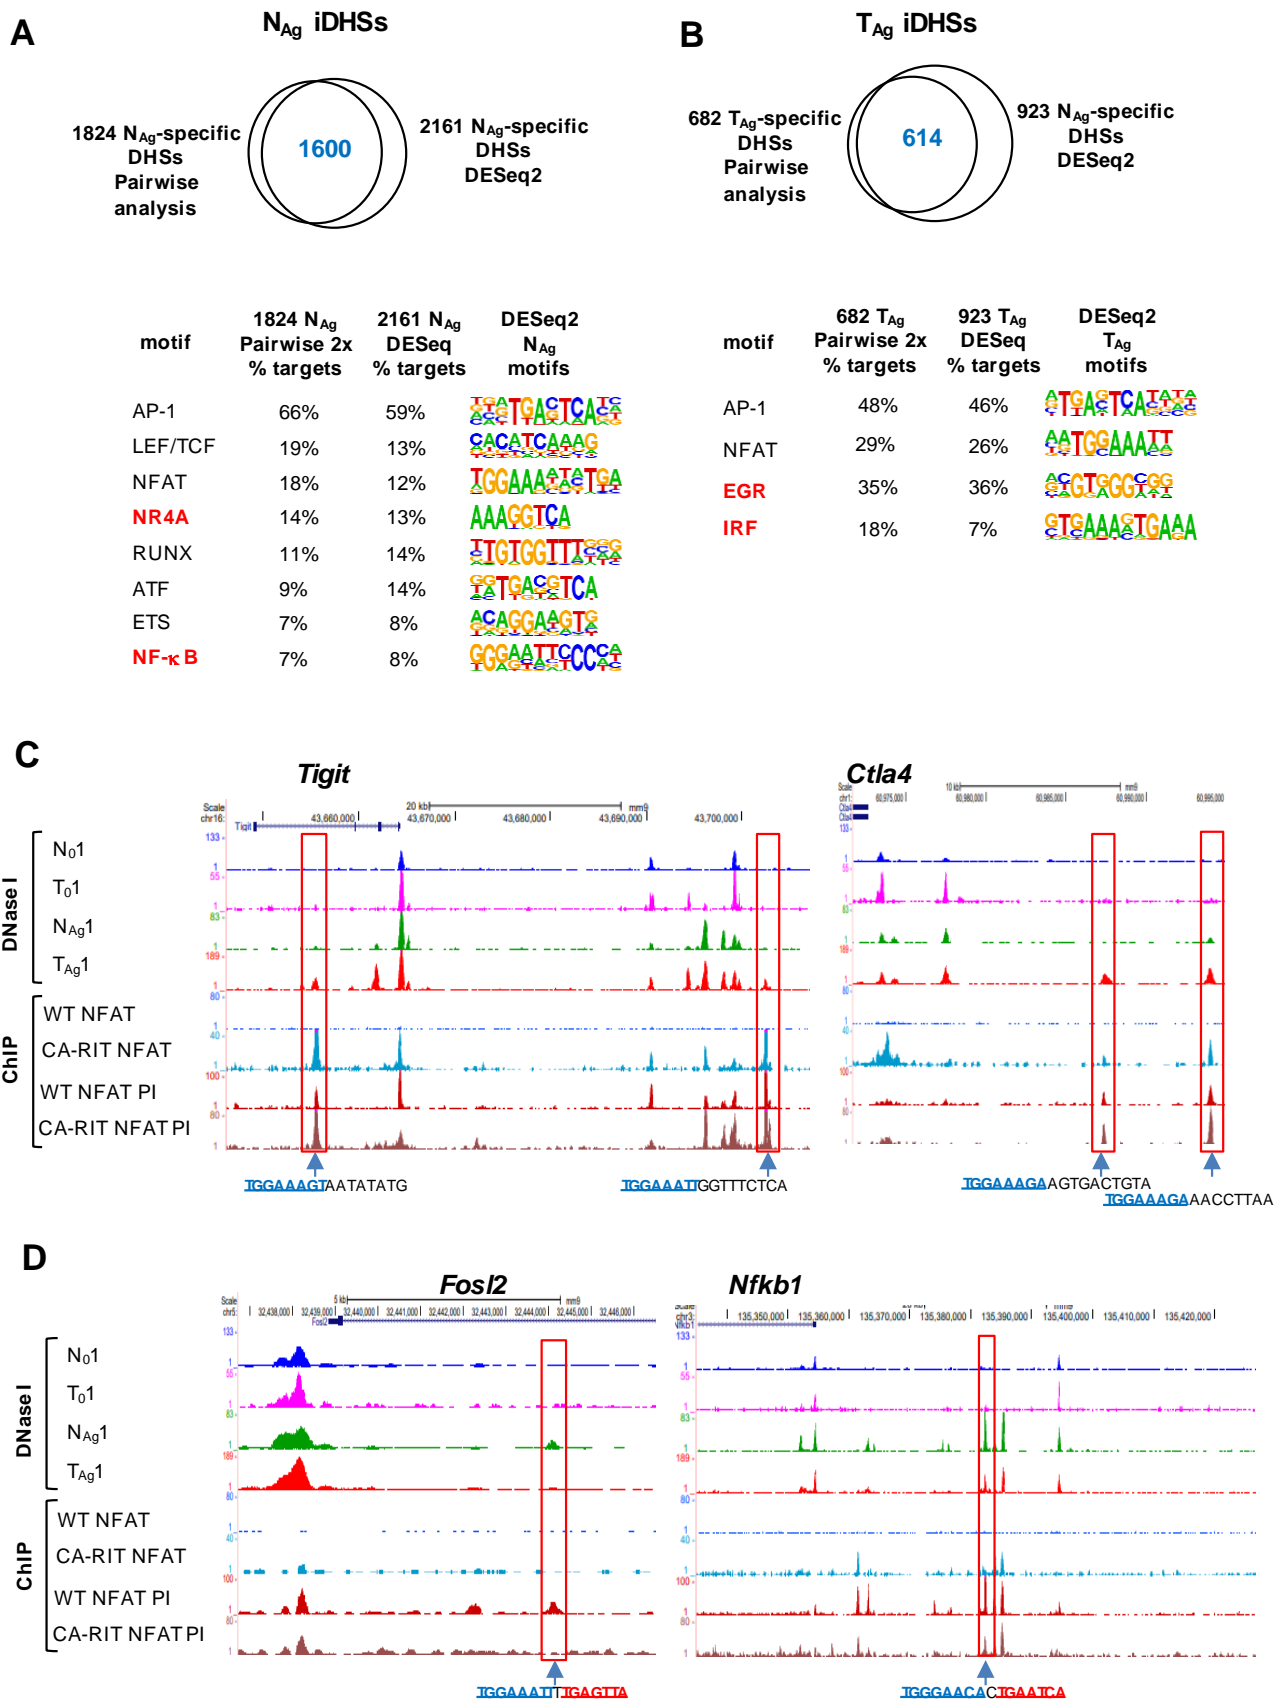

**Figure S4. Tolerance-associated genes can bind NFAT independently of AP-1.** Related to Figure 4.

(A,B) Homer *de novo* identification of enriched TF motifs in the 1824  $N_{Ag}$  pairwise derived targets compared to the 2161  $N_{Ag}$  DESeq2 derived targets (A) and the 682  $T_{Ag}$  pairwise derived targets compared to the 923  $T_{Ag}$  DESeq2 derived targets.

(B,C) UCSC genome browser tracks showing DNase-Seq data from resting cells ( $N_0$  and  $T_0$ ) and antigen-stimulated cells ( $N_{Ag}$  and  $T_{Ag}$ ) alongside NFAT1 ChIP-seq data from CD8 WT cells +/- PI and CA-RIT-NFAT1 cells +/- PI (Martinez et al., 2015).

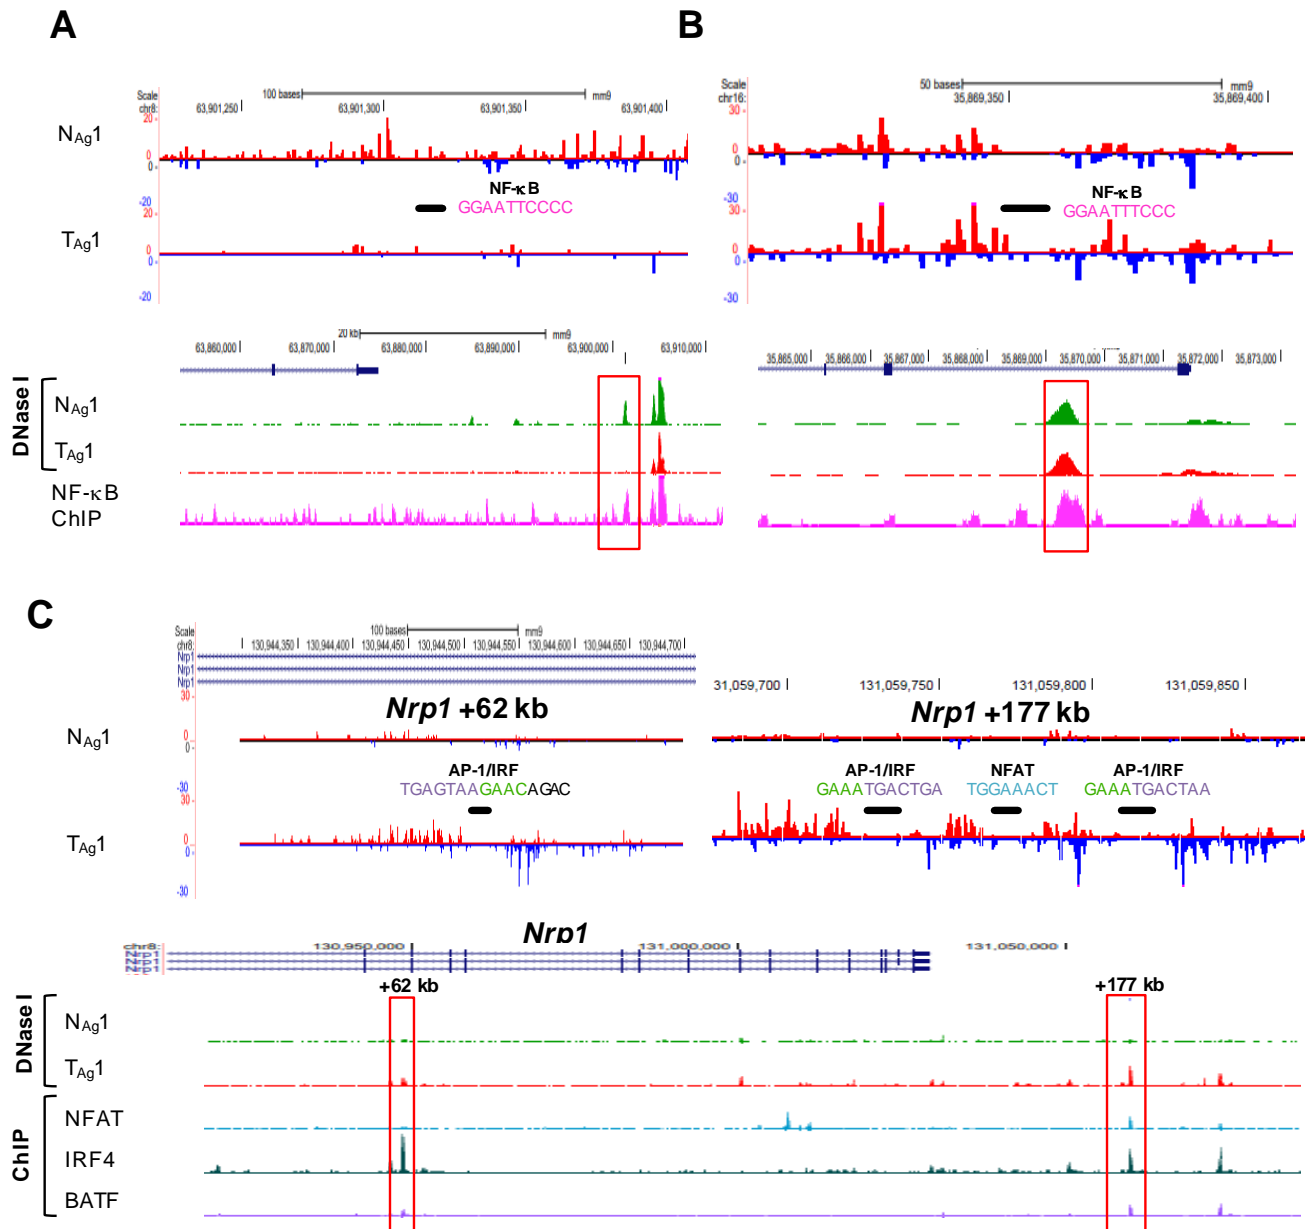

**Figure S5. Examples of TF occupancy in naïve and tolerized T cells.** Related to Figure 5.

(A,B) Examples of Wellington digital footprinting of DNase-Seq data showing protection of an NF- $\kappa$ B site at a  $N_{Ag}$ -specific iDHSs (A) and at a shared iDHSs (B) DNase-Seq data is shown for  $N_{Ag}$  and  $T_{Ag}$  and ChIP-seq data for NF- $\kappa$ B (Oh et al., 2017).

(C) Examples of Wellington digital footprinting of DNase-Seq data showing protection of NFAT and composite AP-1/IRF motifs DNase-Seq data is shown for  $N_{Ag}$  and  $T_{Ag}$  and ChIP-seq data for NFAT1 (Martinez et al., 2015), IRF4 and BATF (Li et al., 2012)

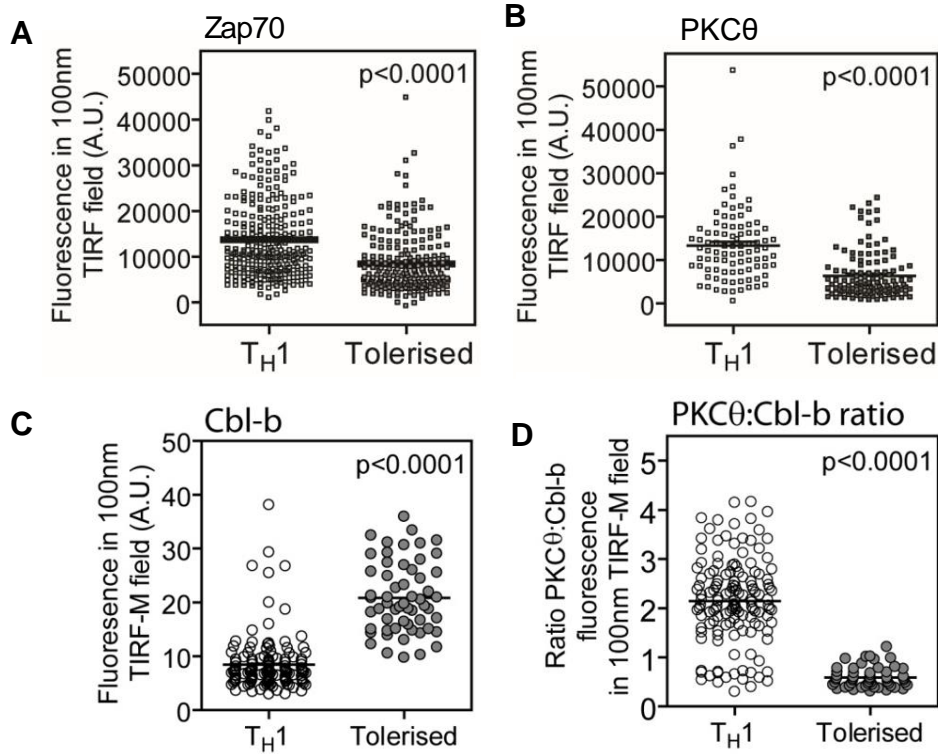

**Figure S6. TIRF microscopy of protein enrichment at the tolerant T cell immunological synapse.** Related to Figure 6.

$T_H1$  and tolerant T cells were left standing on anti-CD3/CD28 coated slides for 8 minutes, labelled with fluorescent antibodies and imaged by total internal fluorescence (TIRF) microscopy. The enrichment of each protein at the T cell-slide interface was assessed by measuring the relative fluorescence in the TIRF-M imaging field.

(A-C) Accumulated TIRF data for a minimum of 30 cells for Zap70, PKC $\theta$  and Cbl-b in  $T_H1$  cells and T cells tolerized by intranasal peptides. Each point in the plot shows data from an individual cell. Shown here are representative data from one of 4 replica experiments. Bars indicate the mean and standard error, with p values calculated by unpaired Student's t-test.

(D) Ratios of signals for PKC $\theta$  relative to Cbl-b for data depicted in B and C.



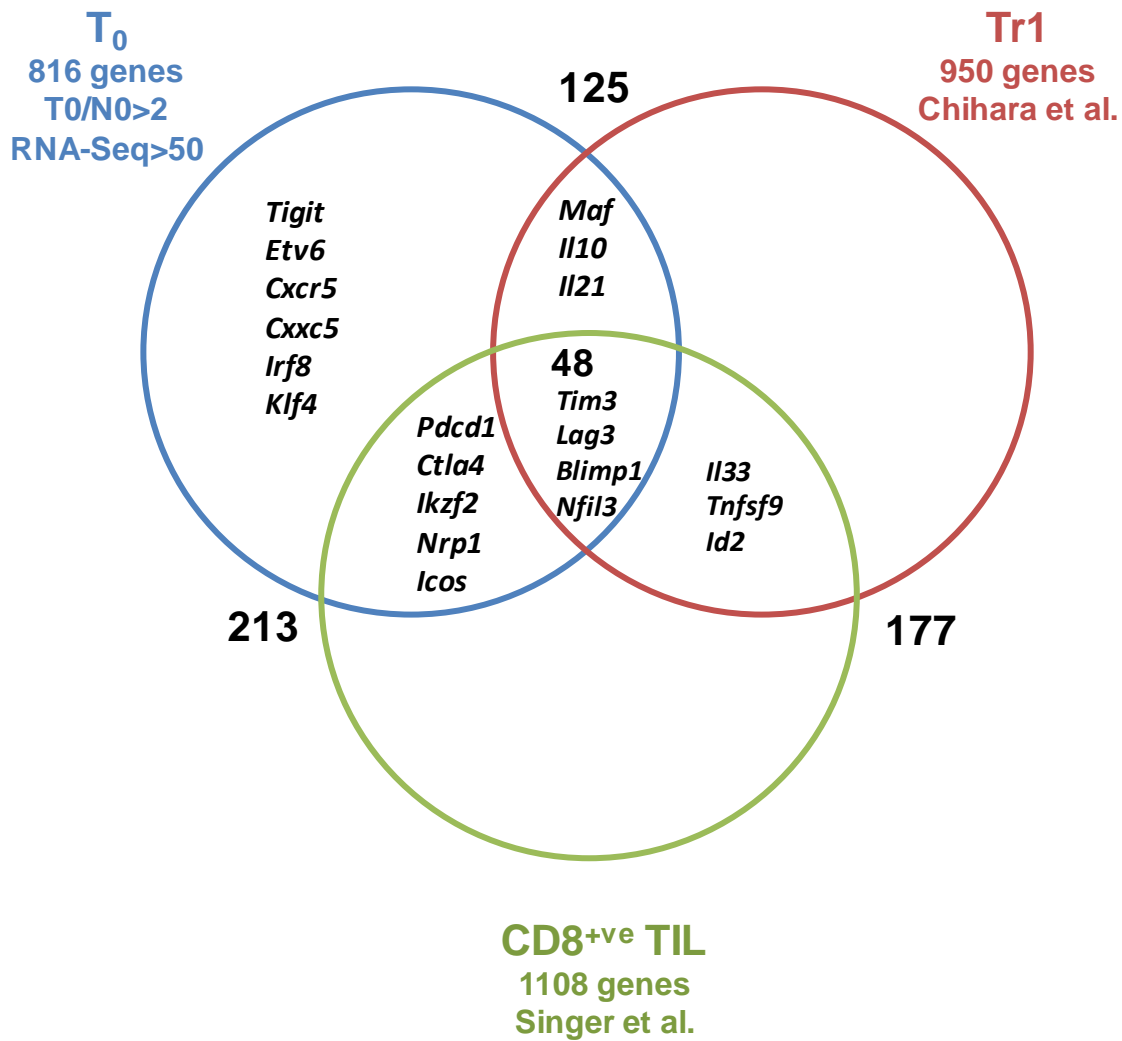

**Figure S7. Venn diagram showing the overlaps in gene expression between tolerized cells, Tr1 cells and TILs.**

Related to Figure 1 and Figure 7.

Comparison of the 816 genes listed in Supplemental table 2 which are upregulated two-fold in T<sub>0</sub> compared to N<sub>0</sub>, with genes defined as being upregulated in CD4<sup>+</sup> Tr1 cells (Chihara et al., 2018) and genes upregulated in CD8<sup>+</sup> TILs (Singer et al., 2016). A subset of genes with regulatory potential are highlighted.

| <b>Gene</b>  | <b>Forward Primer</b>          | <b>Reverse Primer</b>      |
|--------------|--------------------------------|----------------------------|
| <i>B2m</i>   | 5'-TTCTGGTGCTTGTCTCACTG        | 5'-CAGTATGTTCGGCTTCCCATTTC |
| <i>Il2</i>   | 5'-GATGAACTTGGACCTCTGCG        | 5'-CATCATCGAATTGGCACTCA    |
| <i>Il10</i>  | 5'- CCTGGGTGAGAAGCTGAAGACC     | 5'-CTTCACCTGCTCCACTGCCTTG  |
| <i>Tigit</i> | 5'-GCAAATGAGTCCCAGCACAG        | 5'-GGGGAGAATATTCCTGAAGGTCC |
| <i>Nr4a3</i> | 5'-CAGTGTCGGGATGGTAAGGAA       | 5'-CAGACGACCTCTCCTCCCTTT   |
| <i>Ehd1</i>  | 5'- CAGGAAGCTCAATGACCTCATCAAGC | 5'-GGCATCTCCTTCTTGAGGGAGC  |
| <i>Icos</i>  | 5'-GCAGCCTGTCCATTTTTGACCCAC    | 5'-AGCTTCAGCTGGCAGCAGAGC   |
| <i>Nfil3</i> | 5'-GAACTCTGCCTTAGCTGAGGT       | 5'-ATCCCGTTTTCTCCGACACG    |
| <i>Tnf</i>   | 5'-CACGTCGTAGCAAACCACCAAGTGGA  | 5'-TGGGAGTAGACAAGGTACAACC  |

Table S6 (relates to STAR Methods resource table)

Primer sequences for real-time qPCR.
